# Supplementary material for: Phylogeographic Reconstruction of African Yellow Fever Virus Isolates Indicates Recent Simultaneous Dispersal into East and West Africa
Source: PLOS journal article supplement (doi:10.1371/journal.pntd.0001910), 2013-03-14
Supplement: S4 (10.1371/journal.pntd.0001910.s004) [file journal.pntd.0001910.s004]

**Table S2:** Posterior mean estimates for diffusion model parameters used in the study. 95% HPD intervals are listed in parentheses, if applicable. Bayes factors for marginal likelihood are listed relative to the fixed rate continuous diffusion model. Marginal likelihood estimation was performed by path sampling and stepping stone methods, the results of which were confirmed by two independent runs of 30 million steps for each diffusion model. Results for the first chain are shown.

| Model      | In P(model   data)<br>-Path<br>Sampling | Bayes Factor<br>-Path<br>Sampling | In P(model   data)<br>-Stepping<br>Stone | Bayes Factor<br>-Stepping<br>Stone | TMRCAs Mean<br>Age           | TMRCAs Mean<br>Latitude | TMRCAs Mean<br>Longitude | Mean<br>Diffusion Rate<br>(km/yr) |
|------------|-----------------------------------------|-----------------------------------|------------------------------------------|------------------------------------|------------------------------|-------------------------|--------------------------|-----------------------------------|
| Continuous | -3952.01                                | 0                                 | -3945.77                                 | 0                                  | 466.63<br>(192.31, 802.88)   | 3.96<br>(-6.60, 15.12)  | 9.881<br>(-15.94, 35.07) | 19.19<br>(10.16, 28.22)           |
| Cauchy     | -3734.66                                | 217.35                            | -3729.34                                 | 216.42                             | 733.11<br>(287.47, 1278.62)  | 4.32<br>(-9.03, 14.28)  | 10.50<br>(-12.53, 34.54) | 10.57<br>(4.86, 17.38)            |
| Lognormal  | -3824.14                                | 127.86                            | -3816.37                                 | 129.40                             | 1114.44<br>(334.91, 2030.73) | 4.01<br>(-10.04, 15.61) | 8.85<br>(-17.33, 34.30)  | 6.56<br>(2.33, 11.66)             |
| Gamma      | -3823.13                                | 128.88                            | -3811.03                                 | 134.73                             | 879.70<br>(322.97, 1492.30)  | 3.89<br>(-9.08, 15.79)  | 10.63<br>(-14.27, 33.59) | 8.152<br>(3.82, 13.73)            |
